# Supplementary material for: On the formation of sandwich and multidecker complexes via π⋯π interaction: a DFT study
Source: Royal Society of Chemistry journal article supplement (doi:10.1039/c8nj04470h), 2018-01-01
Supplement: c8nj04470h1.pdf [file c8nj04470h1.pdf]

### Electronic Supplementary Information

Manuscript ID NJ-ART-09-2018-004470 R1

Title: On the formation of sandwich and multidecker complexes via  $\pi\cdots\pi$  interaction: A DFT study

Bapan Saha, Rinkumani Deka, Anjali Das and Pradip Kr. Bhattacharyya\*

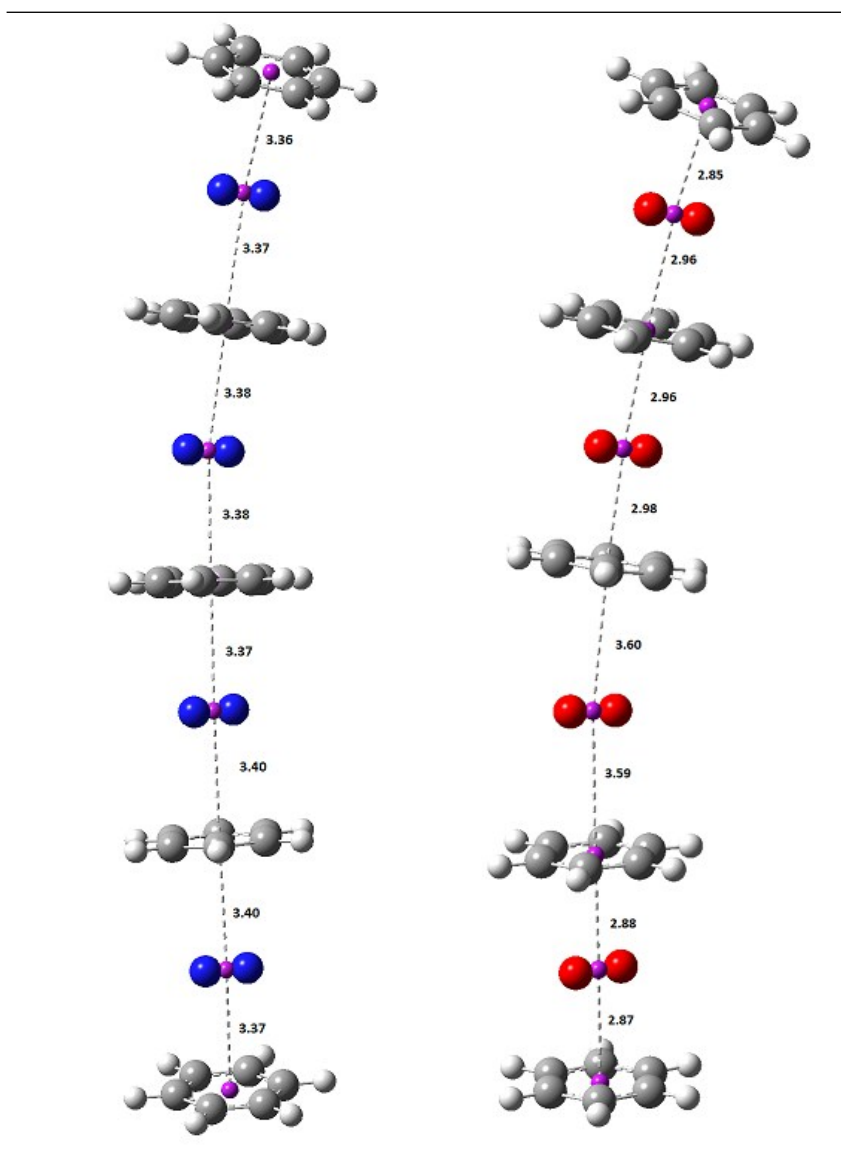

Supplementary Fig. S1: Optimized geometries of (a) 5Ben-4N<sub>2</sub> and (b) 5Ben-4O<sub>2</sub> complexes obtained at  $\omega$ B97-XD/6-311++G(d,p) level of theory

**Supplementary Table S1:**  $\lambda_{\max}$  (nm), energies (E in eV), oscillators strength ( $f$ ), involved transition and orbital contribution for the complexes obtained at B3LYP/6-31++G(d,p) level of theory

| Systems              | $\lambda_{\max}$ (nm) | E (eV) | Oscillators strength, $f$ | Involved transition         | Orbital contribution (%) |
|----------------------|-----------------------|--------|---------------------------|-----------------------------|--------------------------|
| Ben                  | 178                   | 6.98   | 0.61                      | HOMO-1 $\rightarrow$ LUMO+1 | 46.6                     |
|                      |                       |        |                           | HOMO $\rightarrow$ LUMO     | 46.5                     |
| Ben-N <sub>2</sub>   | 177                   | 6.99   | 0.57                      | HOMO-1 $\rightarrow$ LUMO+2 | 46.1                     |
|                      |                       |        |                           | HOMO $\rightarrow$ LUMO+3   | 46.8                     |
| Ben-O <sub>2</sub>   | 220                   | 5.63   | 0.05                      | HOMO $\rightarrow$ LUMO+1   | 70.1                     |
|                      | 183                   | 6.77   | 0.04                      | HOMO-1 $\rightarrow$ LUMO+5 | 69.6                     |
|                      | 258                   | 4.80   | 0.04                      | HOMO-2 $\rightarrow$ LUMO   | 10.9                     |
|                      |                       |        |                           | HOMO-1 $\rightarrow$ LUMO+2 | 69.8                     |
|                      | 406                   | 3.05   | 0.13                      | HOMO-2 $\rightarrow$ LUMO   | 70.3                     |
|                      |                       |        |                           | HOMO $\rightarrow$ LUMO+2   | 10.7                     |
| 2Ben-N <sub>2</sub>  | 211                   | 5.87   | 0.11                      | HOMO $\rightarrow$ LUMO+2   | 20.2                     |
|                      |                       |        |                           | HOMO $\rightarrow$ LUMO+4   | 67.2                     |
| 2Ben-O <sub>2</sub>  | 272                   | 4.56   | 0.05                      | HOMO $\rightarrow$ LUMO+3   | 20.5                     |
|                      |                       |        |                           | HOMO $\rightarrow$ LUMO+4   | 67.5                     |
|                      |                       |        |                           | 461                         | 2.69                     |
| 3Ben-2N <sub>2</sub> | 213                   | 5.81   | 0.21                      | HOMO $\rightarrow$ LUMO+2   | 52.6                     |
|                      |                       |        |                           | HOMO $\rightarrow$ LUMO+4   | 33.4                     |
| 3Ben-2O <sub>2</sub> | 501                   | 2.47   | 0.47                      | HOMO-6 $\rightarrow$ LUMO+1 | 18.3                     |
|                      |                       |        |                           | HOMO-3 $\rightarrow$ LUMO   | 67.7                     |
| 4Ben-3N <sub>2</sub> | 214                   | 5.80   | 0.18                      | HOMO-3 $\rightarrow$ LUMO+3 | 25.1                     |
|                      |                       |        |                           | HOMO $\rightarrow$ LUMO+3   | 45.7                     |
| 4Ben-3O <sub>2</sub> | 523                   | 2.37   | 0.67                      | HOMO-8 $\rightarrow$ LUMO+1 | 23.4                     |
|                      |                       |        |                           | HOMO-3 $\rightarrow$ LUMO   | 64.8                     |
| 5Ben-4N <sub>2</sub> | 216                   | 5.75   | 0.05                      | HOMO $\rightarrow$ LUMO     | 31.5                     |
|                      |                       |        |                           | HOMO-1 $\rightarrow$ LUMO   | 17.4                     |
| 5Ben-4O <sub>2</sub> | 767                   | 1.62   | 0.001                     | HOMO-2 $\rightarrow$ LUMO+1 | 42.2                     |
|                      |                       |        |                           | HOMO-2 $\rightarrow$ LUMO+3 | 54.0                     |
